# Supplementary material for: The Effect of Munsell Neutral Value Scale on the Color of Yellow Jadeite and Comparison between AP and K-Means Clustering Color Grading Schemes
Source: MDPI journal article supplement (doi:10.3390/cryst12020241), 2022-02-10
Supplement: s1 [file s1]

# The Effect of Munsell Neutral Value Scale on the color of yellow jadeite and Comparison between AP and K-means clustering grading schemes

Ziyuan Liu <sup>1</sup>, Ying Guo <sup>1, \*</sup>

<sup>1</sup> School of Gemmology, China University of Geosciences (Beijing), Beijing 100083, China;  
1059800843@qq.com (Z.L)

\* Correspondence: guoying@cugb.edu.cn

Table S1 . Relation between Yb and Lightness L\*

| 0. 9   | 0. 787 | 0. 684 | 0. 591 | 0. 507 | 0. 431 | 0. 362 | 0. 3    | 0. 246 | 0. 198  | 0. 156 | 0. 12  | 0. 09  | 0. 066 | 0. 046 | 0. 031 | 0. 02  | 0. 012 | 0. 006 |
|--------|--------|--------|--------|--------|--------|--------|---------|--------|---------|--------|--------|--------|--------|--------|--------|--------|--------|--------|
| 58. 8  | 58. 17 | 58. 4  | 57. 59 | 57. 56 | 56. 45 | 57. 39 | 55. 84  | 56. 63 | 56. 42  | 56. 36 | 56. 01 | 55. 86 | 56. 24 | 56. 37 | 54. 79 | 56. 39 | 55. 95 | 54. 43 |
| 69. 53 | 68. 67 | 66. 14 | 65     | 64. 75 | 62. 96 | 62. 24 | 61. 02  | 60. 11 | 59. 85  | 58. 68 | 58. 99 | 57. 48 | 57. 4  | 56. 55 | 56. 53 | 56. 68 | 56. 2  | 55. 29 |
| 79. 36 | 77. 12 | 74. 81 | 73. 63 | 69. 66 | 67. 61 | 66. 37 | 64. 62  | 63. 92 | 62. 35  | 62. 15 | 60. 85 | 60. 33 | 59. 94 | 59. 85 | 58. 62 | 58. 93 | 57. 98 | 57. 03 |
| 79. 89 | 76. 96 | 75. 26 | 74. 99 | 71. 12 | 70. 91 | 70. 03 | 69. 53  | 68. 24 | 66. 89  | 66. 46 | 64. 6  | 64. 13 | 64. 77 | 62. 14 | 61. 85 | 61. 33 | 60. 5  | 58. 5  |
| 76. 02 | 73. 82 | 72. 19 | 69. 8  | 68. 28 | 67. 76 | 64. 62 | 63. 68  | 62. 32 | 60. 56  | 59. 87 | 59. 76 | 58. 72 | 57. 85 | 57. 62 | 57. 21 | 56. 93 | 56. 85 | 56. 38 |
| 70. 28 | 68. 1  | 68. 05 | 65. 5  | 63. 06 | 62. 5  | 60. 69 | 59. 07  | 57. 79 | 57. 31  | 56. 18 | 55. 77 | 55. 42 | 54. 98 | 54. 32 | 53. 99 | 53. 43 | 53. 23 | 53. 19 |
| 75. 22 | 74. 01 | 72. 8  | 71. 59 | 70. 38 | 69. 17 | 67. 96 | 66. 75  | 65. 54 | 64. 04  | 62. 54 | 61. 04 | 59. 54 | 58. 04 | 57. 04 | 56. 48 | 55. 23 | 54. 97 | 54. 59 |
| 58. 84 | 58. 73 | 58. 23 | 57. 95 | 57. 72 | 57. 43 | 57. 01 | 56. 89  | 56. 75 | 56. 43  | 56. 21 | 55. 98 | 55. 73 | 55. 52 | 55. 13 | 55     | 54. 96 | 54. 73 | 54. 65 |
| 59. 09 | 58. 58 | 58. 31 | 58. 03 | 57. 83 | 57. 62 | 57. 43 | 57. 35  | 57. 32 | 57. 32  | 57. 4  | 57. 34 | 57. 29 | 57. 26 | 57. 24 | 57. 19 | 57. 16 | 57. 09 | 57. 14 |
| 61. 81 | 60. 3  | 59. 21 | 57. 79 | 55. 98 | 54. 2  | 53. 18 | 52. 19  | 51. 53 | 50. 34  | 49. 75 | 49. 05 | 48. 65 | 47. 96 | 47. 5  | 47. 01 | 46. 63 | 46. 21 | 45. 93 |
| 74. 44 | 73. 72 | 73     | 72. 28 | 71. 56 | 71. 03 | 70. 5  | 69. 97  | 69. 44 | 69. 03  | 68. 62 | 68. 21 | 67. 8  | 67. 39 | 66. 98 | 66. 53 | 66. 21 | 66. 75 | 65. 32 |
| 56. 94 | 56. 12 | 55. 63 | 55. 14 | 54. 65 | 54. 16 | 53. 77 | 53. 38  | 52. 99 | 52. 6   | 52. 21 | 51. 87 | 51. 53 | 51. 19 | 50. 85 | 50. 64 | 50. 43 | 50. 22 | 50. 38 |
| 47. 71 | 47. 63 | 47. 57 | 47. 55 | 47. 62 | 47. 58 | 47. 53 | 47. 43  | 47. 48 | 47. 52  | 47. 32 | 47. 34 | 47. 36 | 47. 28 | 47. 28 | 47. 21 | 47. 26 | 47. 21 | 47. 19 |
| 76. 78 | 76. 21 | 75. 87 | 75. 75 | 75. 81 | 75. 47 | 75. 32 | 74. 99  | 74. 62 | 74. 32  | 74. 1  | 73. 85 | 73. 74 | 73. 61 | 73. 42 | 73. 1  | 72. 58 | 72. 19 | 71. 75 |
| 48. 93 | 48. 64 | 48. 53 | 48. 43 | 48. 5  | 48. 47 | 48. 41 | 48. 37  | 48. 32 | 48. 28  | 48. 24 | 48. 13 | 48. 09 | 48. 07 | 48. 09 | 48. 01 | 47. 99 | 47. 98 | 47. 98 |
| 71. 17 | 70. 75 | 70. 4  | 70. 05 | 69. 74 | 69. 39 | 69. 04 | 68. 69  | 68. 39 | 68. 04  | 67. 69 | 67. 34 | 66. 99 | 66. 64 | 66. 37 | 66. 02 | 65. 67 | 65. 32 | 65. 31 |
| 78. 49 | 78. 46 | 78. 43 | 78. 4  | 78. 35 | 78. 32 | 78. 29 | 78. 31  | 78. 29 | 78. 27  | 78. 25 | 78. 23 | 78. 21 | 78. 22 | 78. 21 | 78. 2  | 78. 18 | 78. 17 | 78. 12 |
| 77. 8  | 77. 22 | 76. 79 | 76. 32 | 75. 89 | 75. 37 | 74. 94 | 74. 51  | 74. 08 | 73. 65  | 73. 34 | 72. 83 | 72. 4  | 72. 15 | 71. 72 | 71. 29 | 71. 1  | 70. 67 | 70. 5  |
| 68. 5  | 67. 85 | 67. 36 | 66. 84 | 66. 47 | 66. 09 | 65. 9  | 65. 69  | 65. 26 | 64. 95  | 64. 64 | 64. 33 | 64. 02 | 64. 17 | 63. 86 | 63. 55 | 63. 24 | 63. 34 | 63. 21 |
| 76. 41 | 75. 87 | 75. 49 | 75. 16 | 74. 79 | 74. 4  | 74. 02 | 73. 65  | 73. 33 | 73. 35  | 73. 14 | 72. 82 | 72. 5  | 72. 31 | 71. 99 | 71. 67 | 71. 38 | 70. 96 | 70. 56 |
| 48. 71 | 48. 04 | 48. 18 | 48. 13 | 48. 03 | 47. 88 | 47. 71 | 47. 53  | 47. 48 | 47. 53  | 47. 53 | 47. 44 | 47. 42 | 47. 25 | 47. 55 | 47. 29 | 47. 34 | 47. 08 | 47. 28 |
| 55. 32 | 54. 09 | 54. 11 | 53. 83 | 54. 2  | 54. 02 | 53. 13 | 53. 566 | 53. 74 | 53. 5   | 53. 44 | 53. 23 | 53. 3  | 53. 31 | 52. 17 | 53. 42 | 53. 28 | 52. 89 | 53. 49 |
| 66. 13 | 65. 55 | 64. 59 | 64. 38 | 64. 51 | 64. 2  | 64. 1  | 63. 62  | 63. 37 | 63. 23  | 62. 86 | 63     | 62. 44 | 62. 81 | 62. 58 | 62. 64 | 62. 44 | 62. 54 | 62. 11 |
| 54. 81 | 54. 6  | 54. 28 | 53. 56 | 53. 96 | 53. 49 | 53. 03 | 52. 79  | 52. 92 | 52. 61  | 52. 57 | 52. 22 | 52. 39 | 52. 23 | 52. 53 | 51. 98 | 52     | 51. 35 | 50     |
| 61. 66 | 60. 67 | 59. 5  | 58. 4  | 57. 47 | 56. 55 | 55. 82 | 55. 24  | 54. 63 | 54. 15  | 53. 55 | 53. 27 | 52. 71 | 52. 37 | 52. 05 | 51. 57 | 52     | 51. 83 | 51. 95 |
| 63. 34 | 60. 98 | 59. 69 | 58. 76 | 56. 59 | 54. 79 | 53. 21 | 51. 84  | 49. 79 | 49. 277 | 48. 88 | 47. 05 | 46. 14 | 46. 03 | 45. 73 | 45. 3  | 45. 03 | 44. 92 | 44. 83 |
| 64. 38 | 63. 72 | 62     | 61. 56 | 62. 42 | 61. 66 | 60. 77 | 61. 02  | 60. 43 | 59. 69  | 60. 06 | 59. 72 | 60. 41 | 59. 58 | 59. 32 | 59. 08 | 59. 24 | 59. 12 | 59. 1  |
| 62. 47 | 61. 13 | 61. 13 | 60. 04 | 58. 94 | 58. 59 | 57. 82 | 57. 44  | 56. 74 | 56. 48  | 56. 12 | 55. 81 | 55. 32 | 55. 63 | 55. 71 | 55. 46 | 54. 69 | 54. 85 | 54. 83 |
| 52. 94 | 52. 4  | 52. 08 | 51. 62 | 51. 25 | 50. 84 | 50. 52 | 49. 74  | 50. 05 | 49. 59  | 49. 25 | 48. 92 | 49. 02 | 48. 81 | 48. 98 | 48. 75 | 48. 97 | 48. 75 | 48. 63 |
| 50. 38 | 50. 13 | 50. 04 | 49. 95 | 49. 73 | 49. 66 | 49. 64 | 49. 51  | 49. 01 | 48. 93  | 48. 88 | 48. 72 | 48. 7  | 48. 69 | 48. 84 | 48. 8  | 48. 76 | 48. 7  | 48. 65 |
| 42. 8  | 42. 59 | 42. 37 | 42. 11 | 41. 63 | 40. 91 | 40. 62 | 40. 33  | 40. 12 | 40. 15  | 39. 99 | 39. 9  | 39. 78 | 39. 67 | 39. 5  | 39. 42 | 39. 35 | 39. 19 | 38. 75 |
| 62. 74 | 62. 09 | 60. 46 | 59. 53 | 58. 7  | 57. 71 | 56. 93 | 56. 18  | 55. 01 | 53. 47  | 53. 24 | 53. 19 | 52. 13 | 50. 92 | 51. 17 | 50. 69 | 51. 47 | 51. 74 | 51. 76 |
| 59. 37 | 58. 57 | 58. 08 | 57. 54 | 56. 66 | 56. 54 | 56. 1  | 55. 95  | 55. 6  | 55. 16  | 54. 79 | 54. 33 | 54. 39 | 54. 41 | 54. 12 | 54. 05 | 54     | 53. 89 | 53. 85 |

Table S2 Relation between Yb and Chroma C\*

| 0. 9      | 0. 787    | 0. 684    | 0. 591    | 0. 507    | 0. 431    | 0. 362    | 0. 3      | 0. 246    | 0. 198    | 0. 156    | 0. 12     | 0. 09     | 0. 066    | 0. 046    | 0. 031    | 0. 02     | 0. 012    | 0. 006    |
|-----------|-----------|-----------|-----------|-----------|-----------|-----------|-----------|-----------|-----------|-----------|-----------|-----------|-----------|-----------|-----------|-----------|-----------|-----------|
| 37. 62787 | 37. 2815  | 37. 10556 | 36. 2205  | 36. 28951 | 34. 95957 | 35. 31672 | 34. 48009 | 35. 13882 | 34. 29147 | 34. 28153 | 34. 11666 | 34. 30229 | 34. 14724 | 34. 36562 | 34. 13533 | 34. 42638 | 33. 72237 | 33. 34226 |
| 30. 03479 | 28. 01452 | 30. 38613 | 29. 58708 | 25. 96293 | 28. 77869 | 26. 9974  | 28. 13107 | 25. 7461  | 27. 3216  | 25. 44579 | 26. 92256 | 26. 46382 | 26. 59091 | 25. 51762 | 25. 33423 | 25. 81794 | 25. 61511 | 25. 0017  |
| 22. 30981 | 21. 79983 | 21. 65202 | 19. 15648 | 19. 15202 | 17. 95414 | 17. 97105 | 17. 69709 | 17. 71274 | 17. 26195 | 18. 45753 | 17. 47783 | 17. 3296  | 17. 2082  | 17. 30284 | 16. 91971 | 17. 41713 | 16. 90976 | 16. 01481 |
| 24. 29631 | 25. 36174 | 23. 66325 | 18. 62898 | 22. 90525 | 23. 86349 | 22. 24477 | 23. 022   | 21. 84793 | 21. 76742 | 22. 91249 | 22. 12938 | 21. 84016 | 22. 14082 | 20. 26891 | 19. 63201 | 18. 43043 | 18. 0839  | 18. 0801  |
| 23. 08474 | 24. 04696 | 22. 48473 | 24. 60025 | 21. 92687 | 20. 46574 | 20. 1631  | 19. 57766 | 18. 86203 | 18. 80794 | 18. 66425 | 18. 61343 | 18. 39348 | 17. 67128 | 17. 52223 | 17. 36881 | 17. 19764 | 17. 14793 | 17. 14793 |
| 25. 98017 | 25. 16634 | 24. 29193 | 23. 67514 | 23. 24831 | 21. 92437 | 22. 03697 | 21. 79472 | 21. 22505 | 20. 43736 | 20. 2743  | 19. 42869 | 19. 25613 | 19. 24747 | 19. 13301 | 18. 89969 | 18. 60833 | 18. 38629 | 18. 29716 |
| 28. 84314 | 28. 56269 | 28. 35225 | 28. 11435 | 27. 82605 | 27. 50732 | 27. 20196 | 26. 81544 | 26. 38291 | 26. 27173 | 26. 05233 | 25. 89278 | 25. 80006 | 25. 79859 | 25. 67891 | 25. 61689 | 25. 44734 | 25. 44734 | 25. 43736 |
| 28. 51877 | 28. 08395 | 27. 97694 | 27. 47264 | 27. 24755 | 26. 98714 | 26. 59995 | 26. 22721 | 25. 99025 | 25. 73359 | 25. 61188 | 25. 43087 | 25. 21045 | 24. 9402  | 24. 84013 | 24. 69001 | 24. 57    | 24. 50002 | 24. 46007 |
| 32. 33674 | 31. 9275  | 31. 85092 | 31. 39146 | 31. 25035 | 30. 99107 | 30. 90733 | 30. 65654 | 30. 502   | 30. 4041  | 30. 36316 | 30. 31903 | 30. 31687 | 30. 26393 | 30. 21674 | 30. 14503 | 30. 03043 | 30. 02329 | 29. 95063 |
| 40. 14219 | 38. 63147 | 37. 3     | 35. 97587 | 34. 83807 | 33. 02353 | 32. 29208 | 31. 19052 | 30. 28243 | 29. 44622 | 28. 64124 | 28. 04479 | 27. 44836 | 26. 87188 | 26. 39974 | 26. 06099 | 25. 72432 | 25. 10551 | 24. 25729 |
| 37. 65151 | 37. 35404 | 37. 05754 | 36. 7628  | 36. 46878 | 36. 17549 | 35. 92295 | 35. 67118 | 35. 42062 | 35. 17024 | 34. 96004 | 34. 75001 | 34. 54018 | 34. 33029 | 34. 16042 | 33. 99059 | 33. 82078 | 33. 651   | 33. 28174 |
| 21. 85693 | 21. 40039 | 20. 94633 | 20. 4925  | 20. 11882 | 19. 74541 | 19. 37265 | 19. 0301  | 18. 6878  | 18. 34577 | 18. 00401 | 17. 66255 | 17. 35139 | 17. 0405  | 16. 73005 | 16. 42008 | 16. 2106  | 15. 98166 | 15. 79198 |
| 18. 63466 | 18. 49951 | 18. 4543  | 18. 39962 | 18. 43736 | 18. 36683 | 18. 33085 | 18. 31002 | 18. 27208 | 18. 24787 | 18. 16875 | 18. 20246 | 18. 11897 | 18. 07508 | 18. 04539 | 18. 03406 | 18. 01284 | 18. 03691 | 18. 0072  |
| 26. 76492 | 26. 16834 | 25. 81709 | 25. 50465 | 25. 18276 | 24. 95108 | 24. 63025 | 24. 24032 | 24. 0401  | 23. 8582  | 23. 55733 | 23. 25692 | 22. 95697 | 22. 65751 | 22. 52471 | 22. 39211 | 22. 49769 | 22. 28019 | 21. 71407 |

|           |           |           |           |           |           |           |           |           |           |           |           |           |           |           |           |           |           |           |
|-----------|-----------|-----------|-----------|-----------|-----------|-----------|-----------|-----------|-----------|-----------|-----------|-----------|-----------|-----------|-----------|-----------|-----------|-----------|
| 21. 24475 | 21. 13319 | 21. 04749 | 20. 95787 | 20. 8496  | 20. 76747 | 20. 68119 | 20. 62609 | 20. 58464 | 20. 53198 | 20. 48721 | 20. 44266 | 20. 39834 | 20. 35599 | 20. 31202 | 20. 26826 | 20. 22474 | 20. 14434 | 20. 0918  |
| 21. 41322 | 20. 20903 | 20. 05465 | 19. 89925 | 19. 77891 | 19. 62607 | 19. 47347 | 19. 32112 | 19. 18885 | 19. 03295 | 18. 88126 | 18. 72985 | 18. 57871 | 18. 42786 | 18. 31002 | 18. 18945 | 18. 05792 | 17. 94415 | 17. 83582 |
| 32. 96094 | 32. 74429 | 32. 60945 | 32. 47464 | 32. 47902 | 32. 3476  | 32. 22062 | 32. 13558 | 32. 05058 | 32. 06721 | 31. 98231 | 31. 89746 | 31. 80272 | 31. 77184 | 31. 73685 | 31. 65217 | 31. 61433 | 31. 57958 | 31. 52403 |
| 29. 43756 | 28. 74971 | 28. 12669 | 27. 53035 | 27. 04626 | 26. 61477 | 26. 66074 | 26. 24372 | 25. 82027 | 25. 39696 | 24. 99378 | 24. 57077 | 24. 15791 | 23. 73349 | 23. 31112 | 23. 18027 | 22. 74818 | 22. 3278  | 22. 31395 |
| 38. 46269 | 38. 00443 | 37. 6077  | 37. 23278 | 36. 91103 | 36. 63091 | 36. 37241 | 36. 29729 | 36. 07792 | 35. 85873 | 35. 92225 | 35. 70345 | 35. 51433 | 35. 40771 | 35. 31742 | 35. 17821 | 35. 16141 | 35. 11126 | 35. 34169 |
| 37. 4932  | 37. 08226 | 36. 7647  | 36. 38351 | 35. 98486 | 35. 57187 | 35. 2062  | 34. 82401 | 34. 4846  | 34. 1534  | 33. 82078 | 33. 42122 | 33. 11844 | 33. 1469  | 32. 8273  | 32. 49915 | 32. 17097 | 31. 84047 | 31. 82599 |
| 21. 29324 | 20. 43649 | 20. 6083  | 20. 2005  | 20. 01384 | 19. 89623 | 19. 57797 | 19. 30992 | 19. 22105 | 19. 37359 | 19. 34716 | 19. 29658 | 19. 27457 | 18. 94129 | 19. 31856 | 19. 11224 | 19. 12643 | 18. 80339 | 19. 08468 |
| 24. 15901 | 27. 82975 | 27. 59283 | 26. 81933 | 26. 50005 | 25. 95459 | 25. 18521 | 24. 74279 | 25. 56461 | 25. 06806 | 25. 09695 | 24. 68118 | 24. 75794 | 24. 70461 | 23. 37    | 25. 06521 | 24. 60143 | 23. 88489 | 24. 75503 |
| 37. 15415 | 36. 16808 | 35. 08009 | 34. 5846  | 35. 53941 | 34. 92823 | 35. 05871 | 34. 25721 | 33. 94297 | 33. 70943 | 33. 2764  | 33. 28876 | 32. 81868 | 33. 22276 | 32. 93186 | 32. 89003 | 32. 63125 | 32. 92679 | 32. 27312 |
| 23. 71321 | 23. 20638 | 22. 76884 | 21. 97753 | 22. 06459 | 21. 53035 | 20. 98427 | 20. 63087 | 20. 48185 | 20. 3774  | 20. 0863  | 19. 94505 | 19. 8703  | 19. 77408 | 19. 7218  | 19. 45756 | 19. 36055 | 18. 95267 | 18. 04081 |
| 32. 90689 | 31. 64612 | 31. 26876 | 29. 96662 | 29. 11363 | 28. 08231 | 27. 35059 | 26. 37032 | 25. 17034 | 24. 68089 | 24. 11284 | 23. 68372 | 23. 27626 | 22. 95837 | 22. 96659 | 24. 91337 | 22. 82842 | 22. 29296 | 22. 34505 |
| 38. 91462 | 37. 51563 | 35. 08203 | 31. 58153 | 29. 97002 | 28. 45576 | 26. 88845 | 25. 83631 | 24. 62577 | 22. 68823 | 21. 17958 | 21. 44229 | 20. 42396 | 19. 28606 | 18. 76538 | 18. 40803 | 18. 23931 | 18. 18479 | 18. 09182 |
| 30. 95087 | 30. 14551 | 28. 6935  | 28. 44154 | 27. 56198 | 27. 66275 | 27. 45198 | 27. 07047 | 26. 70003 | 26. 10007 | 25. 85085 | 25. 52143 | 25. 284   | 25. 2135  | 25. 71225 | 25. 48569 | 25. 42662 | 25. 22516 | 25. 21496 |
| 35. 06543 | 33. 20747 | 32. 35276 | 31. 05667 | 29. 70387 | 29. 26947 | 28. 36428 | 27. 94646 | 27. 23801 | 26. 86798 | 26. 40871 | 26. 035   | 25. 93383 | 25. 9751  | 25. 90405 | 25. 63991 | 24. 82728 | 24. 78789 | 24. 78734 |
| 32. 09808 | 31. 00296 | 30. 412   | 29. 46386 | 28. 70057 | 28. 00037 | 27. 40721 | 26. 27329 | 26. 39759 | 25. 69996 | 25. 13931 | 24. 71215 | 24. 70233 | 24. 43304 | 24. 52521 | 24. 20749 | 24. 40394 | 24. 37996 | 24. 44032 |
| 21. 20438 | 21. 21814 | 20. 94914 | 20. 77072 | 20. 67301 | 20. 56975 | 20. 57822 | 20. 42267 | 20. 63944 | 20. 70746 | 20. 68898 | 20. 57729 | 20. 42789 | 20. 32613 | 20. 31621 | 20. 28385 | 20. 27263 | 20. 01697 | 19. 99328 |
| 18. 16142 | 17. 70482 | 17. 13711 | 16. 75134 | 16. 04669 | 16. 06095 | 15. 73857 | 15. 36534 | 15. 01555 | 14. 91898 | 14. 7997  | 13. 24973 | 13. 63801 | 13. 32997 | 13. 18685 | 13. 14325 | 13. 36177 | 13. 13618 | 13. 27698 |
| 24. 82438 | 23. 63795 | 22. 75989 | 22. 15989 | 21. 06419 | 20. 90626 | 20. 38916 | 20. 00451 | 19. 55517 | 19. 02978 | 18. 52675 | 18. 044   | 18. 15232 | 18. 09201 | 18. 13172 | 17. 89081 | 17. 85072 | 17. 80047 | 17. 65028 |

Table S3 Relation between Yb and Hue h°

| 0. 9      | 0. 787    | 0. 684    | 0. 591    | 0. 507    | 0. 431    | 0. 362    | 0. 3      | 0. 246    | 0. 198    | 0. 156    | 0. 12     | 0. 09     | 0. 066    | 0. 046    | 0. 031    | 0. 02     | 0. 012    | 0. 006    |
|-----------|-----------|-----------|-----------|-----------|-----------|-----------|-----------|-----------|-----------|-----------|-----------|-----------|-----------|-----------|-----------|-----------|-----------|-----------|
| 75. 2411  | 75. 51374 | 76. 08097 | 76. 20573 | 76. 49269 | 76. 30454 | 76. 81328 | 76. 48617 | 76. 97963 | 77. 3201  | 77. 47058 | 77. 47768 | 78. 17936 | 77. 7126  | 77. 8434  | 77. 72542 | 77. 84823 | 77. 83315 | 77. 60373 |
| 80. 98016 | 81. 04613 | 81. 63929 | 81. 64564 | 82. 36107 | 82. 3537  | 82. 93545 | 82. 38117 | 83. 149   | 83. 25274 | 83. 49824 | 83. 366   | 83. 66397 | 83. 54274 | 83. 47152 | 83. 51483 | 83. 50363 | 83. 33895 | 83. 72756 |
| 92. 37039 | 92. 95346 | 93. 92886 | 94. 35758 | 94. 56878 | 95. 16587 | 94. 68067 | 95. 30685 | 95. 49716 | 95. 54227 | 95. 21046 | 95. 70374 | 95. 78633 | 95. 76065 | 95. 89531 | 95. 86    | 95. 69077 | 95. 86349 | 96. 19498 |
| 92. 05469 | 92. 32833 | 93. 42068 | 94. 1122  | 93. 93684 | 93. 41562 | 93. 97778 | 93. 41756 | 94. 1299  | 94. 11897 | 93. 83527 | 94. 15462 | 94. 21034 | 94. 20437 | 94. 68283 | 94. 8659  | 95. 31192 | 95. 47859 | 95. 35235 |
| 81. 52161 | 80. 87638 | 82. 11694 | 81. 86199 | 82. 9689  | 82. 96913 | 82. 97697 | 83. 00055 | 82. 76246 | 83. 35556 | 83. 42751 | 83. 44036 | 83. 67471 | 83. 6091  | 83. 85037 | 83. 92822 | 83. 93415 | 83. 91636 | 83. 91636 |
| 80. 35725 | 80. 38755 | 80. 27592 | 80. 68202 | 81. 00822 | 81. 30499 | 81. 45525 | 81. 62501 | 81. 50655 | 81. 48698 | 81. 70349 | 81. 63603 | 81. 6504  | 81. 82718 | 82. 11057 | 82. 13448 | 82. 10312 | 82. 10102 | 82. 06207 |
| 84. 33216 | 84. 51788 | 84. 72045 | 85. 10518 | 85. 2813  | 85. 47689 | 85. 59461 | 85. 74473 | 85. 78303 | 85. 80872 | 85. 77297 | 85. 74659 | 85. 82024 | 85. 86456 | 85. 84503 | 85. 90216 | 85. 8745  | 85. 8745  | 85. 87286 |
| 86. 36469 | 86. 49169 | 86. 72441 | 86. 85147 | 87. 03576 | 87. 47456 | 87. 82537 | 87. 96878 | 88. 43533 | 89. 08773 | 89. 35179 | 89. 57227 | 89. 70457 | 89. 8158  | 89. 86103 | 89. 99921 | 90. 02232 | 90. 02454 | 90. 09497 |
| 81. 52283 | 81. 70321 | 81. 90124 | 82. 09478 | 82. 22532 | 82. 45815 | 82. 64326 | 83. 07241 | 83. 283   | 83. 56482 | 83. 74603 | 83. 8129  | 83. 8505  | 83. 89678 | 84. 02069 | 84. 04454 | 84. 11752 | 84. 25047 | 84. 29407 |
| 75. 86375 | 76. 26141 | 76. 28184 | 76. 32305 | 76. 71267 | 76. 68013 | 77. 08303 | 77. 27725 | 77. 58646 | 77. 64563 | 77. 98809 | 78. 02042 | 78. 05416 | 78. 6212  | 79. 10047 | 79. 60573 | 80. 12425 | 80. 38708 | 80. 33377 |
| 87. 70033 | 87. 9888  | 88. 28189 | 88. 53294 | 88. 78804 | 89. 04728 | 89. 31157 | 89. 5796  | 89. 70578 | 89. 83376 | 89. 96366 | 90. 00384 | 90. 13691 | 90. 18812 | 90. 23963 | 90. 29165 | 90. 34419 | 90. 39727 | 90. 53998 |
| 86. 7129  | 86. 99051 | 87. 17086 | 87. 3592  | 87. 56597 | 87. 78057 | 87. 97386 | 88. 17768 | 88. 38897 | 88. 60814 | 88. 83564 | 89. 07193 | 89. 3188  | 89. 60832 | 89. 90859 | 90. 12891 | 90. 44943 | 90. 77937 | 90. 86189 |
| 79. 4962  | 79. 89078 | 80. 14956 | 80. 40438 | 80. 64498 | 80. 82995 | 80. 93841 | 81. 14985 | 81. 51211 | 81. 59599 | 81. 55892 | 81. 7021  | 81. 7593  | 81. 83518 | 81. 82157 | 81. 84849 | 81. 87092 | 82. 01031 | 81. 99696 |
| 93. 27598 | 94. 09823 | 94. 08792 | 94. 3415  | 94. 6032  | 94. 85397 | 95. 12824 | 95. 42547 | 95. 68682 | 95. 89975 | 96. 14727 | 96. 40119 | 96. 66176 | 96. 92921 | 97. 09876 | 97. 27033 | 97. 36426 | 97. 64466 | 97. 81976 |
| 82. 27776 | 82. 70169 | 83. 0285  | 83. 46664 | 83. 90263 | 84. 21131 | 84. 66037 | 85. 12034 | 85. 50161 | 85. 96592 | 86. 15333 | 86. 34156 | 86. 53061 | 86. 63614 | 86. 82663 | 87. 01795 | 87. 2101  | 87. 22727 | 86. 81989 |
| 95. 58526 | 96. 43559 | 96. 60079 | 96. 73996 | 96. 75225 | 96. 95256 | 97. 15601 | 97. 36267 | 97. 56469 | 97. 68819 | 97. 90395 | 98. 1232  | 98. 34603 | 98. 5725  | 98. 85015 | 99. 06915 | 99. 07181 | 99. 42147 | 99. 6751  |
| 83. 40455 | 83. 48378 | 83. 545   | 83. 60672 | 83. 69639 | 83. 70616 | 83. 64526 | 83. 718   | 83. 79112 | 83. 84833 | 83. 92195 | 83. 99597 | 84. 0685  | 84. 08082 | 84. 16501 | 84. 24025 | 84. 37907 | 84. 46402 | 84. 56377 |
| 86. 46021 | 86. 67397 | 86. 74211 | 86. 94159 | 87. 07701 | 87. 11511 | 87. 29239 | 87. 13925 | 87. 26938 | 87. 40384 | 87. 54487 | 87. 6886  | 87. 83829 | 88. 113   | 88. 2748  | 88. 33903 | 88. 50828 | 88. 53069 | 88. 9666  |
| 78. 09569 | 78. 304   | 78. 443   | 78. 57599 | 78. 77567 | 78. 97551 | 79. 08853 | 78. 87246 | 78. 99797 | 79. 12502 | 79. 27454 | 79. 40384 | 79. 54356 | 79. 67621 | 79. 84736 | 80. 00522 | 80. 06659 | 80. 25107 | 80. 18387 |
| 80. 8324  | 81. 1834  | 81. 53214 | 81. 82452 | 82. 10292 | 82. 44928 | 82. 73121 | 82. 98236 | 83. 21393 | 83. 48538 | 83. 64235 | 83. 9106  | 83. 76723 | 84. 1205  | 84. 25571 | 84. 55155 | 84. 87117 | 85. 26913 | 85. 59222 |
| 83. 16412 | 82. 50647 | 84. 16609 | 84. 61736 | 84. 79672 | 85. 02596 | 85. 26743 | 85. 52859 | 85. 86659 | 85. 78088 | 86. 0424  | 86. 06167 | 86. 14655 | 86. 25984 | 86. 42308 | 86. 23363 | 86. 50676 | 86. 62915 | 86. 58929 |
| 79. 35356 | 80. 31778 | 80. 73905 | 81. 05291 | 82. 99751 | 83. 20467 | 83. 47602 | 84. 10393 | 84. 16036 | 84. 48006 | 84. 50944 | 84. 60256 | 84. 94501 | 85. 02715 | 83. 33384 | 84. 08866 | 85. 38022 | 85. 50482 | 85. 29305 |
| 80. 04332 | 80. 81304 | 81. 59944 | 81. 94658 | 82. 11672 | 82. 42438 | 82. 68379 | 83. 01665 | 83. 3255  | 83. 5013  | 83. 81448 | 83. 93805 | 84. 06102 | 84. 02998 | 84. 18667 | 84. 21423 | 84. 3444  | 84. 27326 | 84. 45941 |
| 80. 86865 | 81. 51666 | 81. 91142 | 82. 35408 | 83. 03947 | 83. 26708 | 83. 55744 | 83. 83725 | 84. 32659 | 84. 43853 | 84. 72973 | 84. 74971 | 85. 22209 | 85. 08218 | 85. 5065  | 85. 26736 | 85. 51073 | 85. 38258 | 85. 33764 |
| 87. 72812 | 88. 21579 | 88. 68888 | 88. 8404  | 89. 13987 | 89. 31076 | 89. 66838 | 89. 76305 | 90. 25042 | 90. 44211 | 90. 83401 | 90. 97099 | 91. 28438 | 91. 50262 | 91. 32729 | 90. 89779 | 91. 51143 | 91. 90902 | 92. 05848 |
| 80. 09659 | 80. 07862 | 81. 46773 | 81. 24399 | 81. 92765 | 82. 20487 | 81. 93856 | 81. 80788 | 81. 77645 | 81. 90785 | 81. 59755 | 82. 56552 | 82. 55844 | 82. 29395 | 83. 15573 | 83. 02131 | 82. 956   | 83. 06169 | 83. 12138 |
| 87. 09948 | 87. 68699 | 88. 28728 | 88. 41285 | 89. 35928 | 89. 23744 | 89. 35653 | 89. 70683 | 89. 95977 | 90. 08613 | 90. 42004 | 90. 56082 | 90. 97466 | 90. 9093  | 90. 71239 | 90. 78662 | 91. 26209 | 91. 11342 | 91. 09115 |
| 81. 87674 | 82. 49735 | 83. 31481 | 83. 75728 | 84. 40129 | 84. 65176 | 85. 12854 | 85. 28129 | 85. 70605 | 85. 96708 | 86. 22242 | 86. 6749  | 86. 35168 | 86. 66711 | 86. 70217 | 86. 84684 | 86. 90391 | 86. 87575 | 86. 89884 |
| 73. 06424 | 73. 4318  | 73. 80736 | 74. 02001 | 74. 41316 | 74. 52243 | 74. 85067 | 74. 97033 | 75. 22276 | 75. 52621 | 75. 6428  | 75. 77162 | 75. 86158 | 75. 96814 | 75. 97394 | 76. 05398 | 76. 04786 | 76. 27602 | 75. 9966  |
| 81. 3341  | 81. 44911 | 81. 55927 | 81. 68114 | 81. 80946 | 81. 85231 | 81. 88385 | 81. 96303 | 82. 27279 | 82. 32642 | 82. 29152 | 82. 3054  | 82. 47497 | 82. 49375 | 82. 49004 | 82. 53493 | 82. 55927 | 82. 6364  | 82. 71431 |
| 73. 49817 | 73. 70078 | 74. 11973 | 74. 38361 | 74. 90185 | 75. 69065 | 75. 57825 | 75. 45032 | 75. 73377 | 75. 4804  | 75. 72046 | 75. 92883 | 76. 33871 | 76. 32562 | 76. 30804 | 76. 35137 | 76. 49134 | 76. 47857 | 76. 53635 |
| 83. 0545  | 83. 84954 | 84. 673   | 85. 17647 | 85. 93275 | 86. 23146 | 86. 97961 | 87. 20755 | 87. 78785 | 88. 20779 | 88. 49838 | 88. 83832 | 89. 12979 | 89. 19012 | 89. 25523 | 89. 50094 | 89. 53183 | 89. 62699 | 89. 72087 |

|       |       |       |       |       |       |       |       |       |       |       |       |       |       |       |       |       |       |       |
|-------|-------|-------|-------|-------|-------|-------|-------|-------|-------|-------|-------|-------|-------|-------|-------|-------|-------|-------|
| 4.73  | 4.38  | 4.44  | 4.32  | 3.47  | 3.85  | 3.34  | 3.75  | 3.09  | 3.23  | 2.9   | 3.13  | 2.94  | 3.01  | 2.92  | 2.88  | 2.94  | 2.99  | 2.75  |
| -0.94 | -1.14 | -1.5  | -1.47 | -1.54 | -1.63 | -1.48 | -1.65 | -1.71 | -1.68 | -1.69 | -1.75 | -1.76 | -1.74 | -1.79 | -1.74 | -1.74 | -1.74 | -1.74 |
| -0.89 | -1.05 | -1.43 | -1.35 | -1.59 | -1.44 | -1.56 | -1.39 | -1.59 | -1.58 | -1.55 | -1.62 | -1.62 | -1.64 | -1.67 | -1.68 | -1.72 | -1.74 | -1.7  |
| 3.42  | 3.83  | 3.1   | 3.5   | 2.7   | 2.52  | 2.48  | 2.4   | 2.39  | 2.19  | 2.15  | 2.14  | 2.04  | 1.98  | 1.89  | 1.85  | 1.83  | 1.83  | 1.83  |
| 4.37  | 4.22  | 4.12  | 3.85  | 3.65  | 3.33  | 3.29  | 3.19  | 3.15  | 3.04  | 2.94  | 2.84  | 2.81  | 2.75  | 2.64  | 2.6   | 2.57  | 2.54  | 2.54  |
| 2.87  | 2.75  | 2.63  | 2.42  | 2.31  | 2.19  | 2.11  | 2.01  | 1.96  | 1.94  | 1.94  | 1.94  | 1.9   | 1.88  | 1.88  | 1.85  | 1.85  | 1.85  | 1.85  |
| 9.83  | 9.2   | 8.87  | 8.53  | 8.03  | 7.63  | 7.24  | 6.89  | 6.53  | 6.32  | 5.98  | 5.84  | 5.7   | 5.32  | 5.01  | 4.72  | 4.43  | 4.21  | 4.09  |
| 1.54  | 1.34  | 1.14  | 0.97  | 0.8   | 0.63  | 0.46  | 0.29  | 0.21  | 0.13  | 0.05  | -0.03 | -0.11 | -0.14 | -0.17 | -0.2  | -0.23 | -0.26 | -0.34 |
| 1.27  | 1.14  | 1.05  | 0.96  | 0.87  | 0.78  | 0.7   | 0.62  | 0.54  | 0.46  | 0.38  | 0.3   | 0.22  | 0.13  | 0.04  | -0.05 | -0.14 | -0.23 | -0.25 |
| 3.41  | 3.26  | 3.17  | 3.08  | 3.01  | 2.94  | 2.9   | 2.83  | 2.71  | 2.68  | 2.68  | 2.64  | 2.61  | 2.58  | 2.58  | 2.57  | 2.56  | 2.52  | 2.52  |
| -1.55 | -1.89 | -1.86 | -1.95 | -2.04 | -2.13 | -2.22 | -2.31 | -2.4  | -2.47 | -2.54 | -2.61 | -2.68 | -2.75 | -2.8  | -2.85 | -2.9  | -2.98 | -2.97 |
| -2.1  | -2.28 | -2.32 | -2.35 | -2.34 | -2.39 | -2.44 | -2.49 | -2.54 | -2.56 | -2.61 | -2.66 | -2.71 | -2.76 | -2.83 | -2.88 | -2.86 | -2.95 | -3.01 |
| 1.84  | 1.69  | 1.62  | 1.49  | 1.4   | 1.36  | 1.28  | 1.33  | 1.25  | 1.17  | 1.09  | 1.01  | 0.93  | 0.8   | 0.72  | 0.69  | 0.61  | 0.59  | 0.42  |
| 6     | 5.71  | 5.44  | 5.2   | 4.97  | 4.7   | 4.48  | 4.28  | 4.1   | 3.9   | 3.77  | 3.57  | 3.62  | 3.42  | 3.31  | 3.11  | 2.9   | 2.65  | 2.47  |
| 2.55  | 2.68  | 2.11  | 1.91  | 1.83  | 1.74  | 1.63  | 1.52  | 1.4   | 1.44  | 1.35  | 1.34  | 1.31  | 1.25  | 1.22  | 1.27  | 1.18  | 1.12  | 1.15  |
| 6.45  | 5.8   | 5.15  | 4.87  | 4.9   | 4.63  | 4.49  | 4.19  | 3.97  | 3.84  | 3.61  | 3.54  | 3.42  | 3.48  | 3.36  | 3.34  | 3.24  | 3.31  | 3.14  |
| 3.78  | 3.44  | 3.22  | 2.94  | 2.69  | 2.54  | 2.37  | 2.23  | 2.04  | 1.99  | 1.86  | 1.84  | 1.67  | 1.71  | 1.56  | 1.62  | 1.53  | 1.54  | 1.48  |
| 1.33  | 1.01  | 0.74  | 0.63  | 0.46  | 0.36  | 0.18  | 0.13  | -0.13 | -0.21 | -0.37 | -0.42 | -0.54 | -0.62 | -0.55 | -0.41 | -0.62 | -0.76 | -0.82 |
| 6.72  | 6.49  | 5.23  | 4.83  | 4.23  | 3.88  | 3.79  | 3.7   | 3.54  | 3.21  | 3.11  | 2.79  | 2.66  | 2.6   | 2.25  | 2.25  | 2.25  | 2.21  | 2.18  |
| 1.59  | 1.24  | 0.88  | 0.81  | 0.33  | 0.39  | 0.33  | 0.16  | 0.04  | -0.06 | -0.21 | -0.27 | -0.45 | -0.42 | -0.34 | -0.37 | -0.58 | -0.51 | -0.5  |
| 4.98  | 4.36  | 3.79  | 3.4   | 2.92  | 2.75  | 2.43  | 2.32  | 2.06  | 1.91  | 1.76  | 1.53  | 1.67  | 1.53  | 1.51  | 1.43  | 1.36  | 1.37  | 1.36  |
| 9.37  | 8.86  | 8.5   | 8.13  | 7.73  | 7.49  | 7.18  | 6.83  | 6.75  | 6.44  | 6.25  | 6.09  | 6.05  | 5.94  | 5.96  | 5.85  | 5.9   | 5.8   | 5.93  |
| 5.17  | 4.98  | 4.7   | 4.52  | 4.19  | 3.98  | 3.93  | 3.87  | 3.71  | 3.75  | 3.66  | 3.23  | 3.23  | 3.16  | 3.13  | 3.11  | 3.13  | 3.08  | 3.1   |
| 1.12  | 0.55  | 0.27  | 0.19  | -0.2  | 0.04  | -0.1  | -0.08 | -0.45 | -0.39 | -0.57 | -0.67 | -0.68 | -0.53 | -0.75 | -0.39 | -0.68 | -0.83 | -0.78 |
| 3.02  | 2.55  | 2.13  | 1.88  | 1.51  | 1.39  | 1.09  | 0.99  | 0.77  | 0.61  | 0.5   | 0.38  | 0.29  | 0.27  | 0.25  | 0.17  | 0.16  | 0.13  | 0.1   |
| 9.61  | 9.35  | 8.95  | 8.66  | 8.5   | 8.3   | 8.08  | 8.08  | 7.94  | 7.55  | 7.46  | 7.42  | 7.05  | 7.29  | 7.26  | 7.28  | 7.27  | 7.13  | 7.18  |
| 1.83  | 1.74  | 1.62  | 1.53  | 1.43  | 1.21  | 1.03  | 0.95  | 0.73  | 0.43  | 0.31  | 0.21  | 0.15  | 0.1   | 0.08  | 0.02  | 0.01  | -0.03 | -0.06 |
| 4.79  | 4.63  | 4.51  | 4.34  | 4.25  | 4.09  | 3.98  | 3.72  | 3.59  | 3.43  | 3.33  | 3.29  | 3.27  | 3.24  | 3.17  | 3.15  | 3.1   | 3.03  | 3     |
| 2.87  | 2.7   | 2.57  | 2.4   | 2.23  | 2.11  | 1.94  | 1.77  | 1.63  | 1.46  | 1.39  | 1.32  | 1.25  | 1.21  | 1.14  | 1.07  | 1     | 0.99  | 1.13  |
| 3.81  | 3.74  | 3.69  | 3.64  | 3.59  | 3.57  | 3.59  | 3.54  | 3.49  | 3.46  | 3.41  | 3.36  | 3.31  | 3.3   | 3.25  | 3.2   | 3.12  | 3.07  | 3.01  |
| 7.96  | 7.73  | 7.56  | 7.4   | 7.21  | 7.03  | 6.91  | 7.03  | 6.91  | 6.79  | 6.71  | 6.59  | 6.47  | 6.37  | 6.25  | 6.13  | 6.09  | 5.97  | 6.05  |
| 4.48  | 4.7   | 4.46  | 4.19  | 3.25  | 3.09  | 2.88  | 2.56  | 2.62  | 2.43  | 2.42  | 2.34  | 2.2   | 2.16  | 2.73  | 2.6   | 2     | 1.89  | 2.05  |
| 3.21  | 3.17  | 3.09  | 3.02  | 2.96  | 2.93  | 2.92  | 2.87  | 2.79  | 2.78  | 2.79  | 2.77  | 2.69  | 2.67  | 2.67  | 2.65  | 2.64  | 2.58  | 2.55  |

Table S6 Relation between Yb and Color Coordinate b\*

| 0.9   | 0.787 | 0.684 | 0.591 | 0.507 | 0.431 | 0.362 | 0.3   | 0.246 | 0.198 | 0.156 | 0.12  | 0.09  | 0.066 | 0.046 | 0.031  | 0.02  | 0.012 | 0.006 |
|-------|-------|-------|-------|-------|-------|-------|-------|-------|-------|-------|-------|-------|-------|-------|--------|-------|-------|-------|
| 24.64 | 23.5  | 22.66 | 22.08 | 21.01 | 20.86 | 20.36 | 19.98 | 19.54 | 19.02 | 18.52 | 18.04 | 18.15 | 18.09 | 18.13 | 17.89  | 17.85 | 17.8  | 17.65 |
| 34.32 | 32.8  | 32.24 | 31.41 | 29.74 | 28.89 | 28.7  | 28.13 | 26.01 | 26.42 | 24.98 | 24.64 | 23.4  | 23.12 | 23.41 | 22.52  | 23.79 | 23.45 | 23.04 |
| 17.41 | 16.99 | 16.48 | 16.13 | 15.49 | 15.56 | 15.24 | 14.87 | 14.55 | 14.44 | 14.34 | 12.85 | 13.25 | 12.95 | 12.81 | 12.77  | 12.99 | 12.77 | 12.91 |
| 30.7  | 29.71 | 29.2  | 28.32 | 27.64 | 26.98 | 26.45 | 25.37 | 25.52 | 24.88 | 24.35 | 23.95 | 23.95 | 23.7  | 23.79 | 23.49  | 23.68 | 23.68 | 23.71 |
| 34.71 | 32.92 | 32.13 | 30.87 | 29.56 | 29.14 | 28.26 | 27.85 | 27.16 | 26.8  | 26.35 | 25.99 | 25.88 | 25.93 | 25.86 | 25.6   | 24.79 | 24.75 | 24.75 |
| 30.91 | 30.12 | 28.68 | 28.43 | 27.56 | 27.66 | 27.45 | 27.07 | 26.7  | 26.1  | 25.85 | 25.52 | 25.28 | 25.21 | 25.71 | 25.483 | 25.42 | 25.22 | 25.21 |
| 38.33 | 36.95 | 34.69 | 31.21 | 29.67 | 28.19 | 26.62 | 25.57 | 24.37 | 22.46 | 20.95 | 21.26 | 20.25 | 19.11 | 18.63 | 18.27  | 18.1  | 18.05 | 17.96 |
| 32.88 | 31.63 | 31.26 | 29.96 | 29.11 | 28.08 | 27.35 | 26.37 | 25.17 | 24.68 | 24.11 | 23.68 | 23.27 | 22.95 | 22.96 | 24.91  | 22.82 | 22.28 | 22.33 |
| 23.41 | 22.95 | 22.54 | 21.78 | 21.9  | 21.38 | 20.85 | 20.51 | 20.38 | 20.28 | 20    | 19.86 | 19.8  | 19.7  | 19.66 | 19.39  | 19.3  | 18.89 | 17.98 |
| 36.59 | 35.7  | 34.7  | 34.24 | 35.2  | 34.62 | 34.77 | 34    | 33.71 | 33.49 | 33.08 | 33.1  | 32.64 | 33.04 | 32.76 | 32.72  | 32.47 | 32.76 | 32.12 |
| 37.01 | 36.64 | 36.36 | 36.01 | 35.64 | 35.26 | 34.92 | 34.56 | 34.24 | 33.93 | 33.61 | 33.23 | 32.92 | 32.97 | 32.66 | 32.35  | 32.04 | 31.73 | 31.73 |
| 37.01 | 28.7  | 28.08 | 27.49 | 27.01 | 26.58 | 26.63 | 26.21 | 25.79 | 25.37 | 24.97 | 24.55 | 24.14 | 23.72 | 23.3  | 23.17  | 22.74 | 22.32 | 22.31 |
| 36.64 | 20.08 | 19.92 | 19.76 | 19.64 | 19.48 | 19.32 | 19.16 | 19.02 | 18.86 | 18.7  | 18.54 | 18.38 | 18.22 | 18.09 | 17.96  | 17.83 | 17.7  | 17.58 |
| 36.36 | 26.1  | 25.75 | 25.43 | 25.1  | 24.86 | 24.53 | 24.13 | 23.92 | 23.73 | 23.42 | 23.11 | 22.8  | 22.49 | 22.35 | 22.21  | 22.31 | 22.08 | 21.51 |
| 36.01 | 18.21 | 18.18 | 18.14 | 18.19 | 18.13 | 18.1  | 18.09 | 18.07 | 18.05 | 17.97 | 18.01 | 17.93 | 17.89 | 17.86 | 17.85  | 17.83 | 17.86 | 17.83 |
| 35.64 | 21.37 | 20.92 | 20.47 | 20.1  | 19.73 | 19.36 | 19.02 | 18.68 | 18.34 | 18    | 17.66 | 17.35 | 17.04 | 16.73 | 16.42  | 16.21 | 15.98 | 15.79 |
| 35.26 | 37.33 | 37.04 | 36.75 | 36.46 | 36.17 | 35.92 | 35.67 | 35.42 | 35.17 | 34.96 | 34.75 | 34.54 | 34.33 | 34.16 | 33.99  | 33.82 | 33.65 | 33.28 |
| 34.92 | 37.52 | 36.23 | 34.95 | 33.9  | 32.13 | 31.47 | 30.42 | 29.57 | 28.76 | 28.01 | 27.43 | 26.85 | 26.34 | 25.92 | 25.63  | 25.34 | 24.75 | 23.91 |
| 34.56 | 28.43 | 28.23 | 28.01 | 27.73 | 27.42 | 27.12 | 26.74 | 26.31 | 26.2  | 25.98 | 25.82 | 25.73 | 25.73 | 25.61 | 25.55  | 25.38 | 25.38 | 25.37 |
| 34.24 | 24.81 | 23.94 | 23.36 | 22.96 | 21.67 | 21.79 | 21.56 | 20.99 | 20.21 | 20.06 | 19.22 | 19.05 | 19.05 | 18.95 | 18.72  | 18.43 | 18.21 | 18.12 |
| 33.93 | 23.74 | 22.27 | 24.35 | 21.76 | 20.31 | 20.01 | 19.43 | 18.71 | 18.68 | 18.54 | 18.49 | 18.28 | 17.56 | 17.42 | 17.27  | 17.1  | 17.05 | 17.05 |
| 33.61 | 25.34 | 23.62 | 18.58 | 22.85 | 23.82 | 22.19 | 22.98 | 21.79 | 21.71 | 22.86 | 22.07 | 21.78 | 22.08 | 20.2  | 19.56  | 18.35 | 18    | 18    |
| 33.23 | 21.77 | 21.6  | 19.1  | 19.09 | 17.88 | 17.91 | 17.62 | 17.63 | 17.18 | 18.38 | 17.39 | 17.24 | 17.12 | 17.21 | 16.83  | 17.33 | 16.82 | 15.92 |
| 34.32 | 32.8  | 32.24 | 31.41 | 29.74 | 28.89 | 28.7  | 28.13 | 26.01 | 26.42 | 24.98 | 24.64 | 23.4  | 23.12 | 23.41 | 22.52  | 23.79 | 23.45 | 23.04 |
| 24.64 | 23.5  | 22.66 | 22.08 | 21.01 | 20.86 | 20.36 | 19.98 | 19.54 | 19.02 | 18.52 | 18.04 | 18.15 | 18.09 | 18.13 | 17.89  | 17.85 | 17.8  | 17.65 |
| 36.38 | 36.09 | 36.01 | 35.17 | 35.28 | 33.96 | 34.38 | 33.52 | 34.23 | 33.45 | 33.46 | 33.3  | 33.57 | 33.36 | 33.59 | 33.35  | 33.65 | 32.96 | 32.56 |
| 31.98 | 31.59 | 31.53 | 31.09 | 30.96 | 30.72 | 30.65 | 30.43 | 30.29 | 30.21 | 30.18 | 30.14 | 30.14 | 30.09 | 30.05 | 29.98  | 29.87 | 29.87 | 29.8  |

|       |       |       |       |       |       |       |       |       |       |       |       |       |       |       |       |       |       |       |
|-------|-------|-------|-------|-------|-------|-------|-------|-------|-------|-------|-------|-------|-------|-------|-------|-------|-------|-------|
| 21.05 | 20.96 | 20.89 | 20.82 | 20.73 | 20.66 | 20.59 | 20.55 | 20.52 | 20.48 | 20.44 | 20.4  | 20.36 | 20.32 | 20.28 | 20.24 | 20.2  | 20.12 | 20.06 |
| 32.74 | 32.53 | 32.4  | 32.27 | 32.28 | 32.15 | 32.02 | 31.94 | 31.86 | 31.88 | 31.8  | 31.72 | 31.63 | 31.6  | 31.57 | 31.49 | 31.46 | 31.43 | 31.38 |
| 37.63 | 37.21 | 36.84 | 36.49 | 36.2  | 35.95 | 35.71 | 35.61 | 35.41 | 35.21 | 35.29 | 35.09 | 34.92 | 34.83 | 34.76 | 34.64 | 34.63 | 34.6  | 34.82 |
| 23.74 | 27.43 | 27.23 | 26.49 | 26.3  | 25.77 | 25.02 | 24.61 | 25.43 | 24.95 | 24.98 | 24.57 | 24.66 | 24.61 | 23.21 | 24.93 | 24.52 | 23.81 | 24.67 |
| 20.96 | 20.98 | 20.72 | 20.55 | 20.46 | 20.36 | 20.37 | 20.22 | 20.45 | 20.52 | 20.5  | 20.39 | 20.25 | 20.15 | 20.14 | 20.11 | 20.1  | 19.85 | 19.83 |
| 28.46 | 28.03 | 27.93 | 27.43 | 27.21 | 26.96 | 26.58 | 26.21 | 25.98 | 25.73 | 25.61 | 25.43 | 25.21 | 24.94 | 24.84 | 24.69 | 24.57 | 24.5  | 24.46 |
